# Supplementary material for: Intrauterine exposure to mild analgesics is a risk factor for development of male reproductive disorders in human and rat
Source: Oxford University Press journal article supplement (doi:10.1093/humrep/deq323), 2010-11-08
Supplement: deq323_Supplementary_Data.zip [file deq323_Supplementary_Data.zip]

Archive with 1 entries (1 files):
- deq323supp.pdf
