# Supplementary material for: Intrauterine exposure to mild analgesics is a risk factor for development of male reproductive disorders in human and rat
Source: Oxford University Press journal article supplement (doi:10.1093/humrep/deq323), 2010-11-08
Supplement: deq323_Supplementary_Data.zip [file deq323_Supplementary_Data.zip › deq323supp.pdf]

## **Supplemental material**

### **Results from Danish and Finnish questionnaires**

Results from the written Danish questionnaire showed a trend in the same direction as the computer assisted telephone interview. Thus, there was an association between consumption of mild analgesics and increased risk of cryptorchidism (although not statistically significant) both when investigating timing and extent of use during pregnancy (Supplemental tables I and II). In Finland, 42.3% (619/1463) of the mothers reported use of mild analgesics, suggesting that the underreporting may not be as severe as in Denmark. The birth prevalence of cryptorchidism in Finland (2.4%) was much lower than in Denmark (9.0%) (Boisen *et al.*, 2004). Thus, a much larger cohort is needed to find a similar number of cases as in the Danish cohort. Nevertheless, there was a trend in the same direction for maternal analgesic use during second trimester (Tables I and II), but we did not find any significant association between maternal use of mild analgesics during pregnancy and the risk of cryptorchidism in the Finnish cohort.

### **Reference**

Boisen KA, Kaleva M, Main KM, Virtanen HE, Haavisto AM, Schmidt IM, Chellakooty M, Damgaard IN, Mau C, Reunanen M et al. Difference in prevalence of congenital cryptorchidism in infants between two Nordic countries. *Lancet* 2004;**363**:1264-1269.

Supplemental table I: Questionnaire data on maternal use of mild analgesics in pregnancy in relation to congenital cryptorchidism in Denmark.

|                                             | Prevalence<br>(%) | Cryptorchidism*<br>(n (%)) | Normal<br>(n (%)) | Fisher's<br>exact (p) | OR crude<br>(95% CI) | OR adjusted<br>(95% CI)** | N*** |
|---------------------------------------------|-------------------|----------------------------|-------------------|-----------------------|----------------------|---------------------------|------|
| <b>Denmark</b>                              |                   |                            |                   |                       |                      |                           |      |
| Use of mild analgesics during pregnancy     |                   |                            |                   |                       |                      |                           |      |
| No                                          | 8.3               | 51 (70.8)                  | 565 (74.1)        | 0.58                  | 1.18 (0.69-2.01)     | 1.36 (0.78-2.36)          | 834  |
| Yes                                         | 9.6               | 21 (29.2)                  | 197 (25.9)        |                       |                      |                           |      |
| Use of mild analgesics during 1st trimester |                   |                            |                   |                       |                      |                           |      |
| No                                          | 8.4               | 57 (83.8)                  | 625 (88.3)        | 0.33                  | 1.45 (0.73-2.88)     | 1.69 (0.84-3.42)          | 776  |
| Yes                                         | 11.7              | 11 (16.2)                  | 83 (11.7)         |                       |                      |                           |      |
| Use of mild analgesics during 2nd trimester |                   |                            |                   |                       |                      |                           |      |
| No                                          | 8.7               | 59 (86.8)                  | 622 (87.9)        | 0.85                  | 1.10 (0.53-2.30)     | 1.32 (0.62-2.83)          | 776  |
| Yes                                         | 9.5               | 9 (13.2)                   | 86 (12.1)         |                       |                      |                           |      |

\* Testis defined as cryptorchid if it was high scrotal, supra-scrotal, inguinal, and non-palpable.

\*\* Adjusted for gestational age, reported disease, twins, and other medicine use during pregnancy.

\*\*\*The numbers differ since not all women provided information about the trimester of use.

Supplemental table II: Questionnaire data on extent of maternal use of mild analgesics during pregnancy in relation to congenital cryptorchidism in Denmark.

|                 | Weeks of usage | N*  | Cryptorchidism** (%) | OR crude (95% CI) | OR adjusted*** (95% CI) |
|-----------------|----------------|-----|----------------------|-------------------|-------------------------|
| Denmark         |                |     |                      |                   |                         |
| Mild analgesics | 0              | 623 | 8.3                  | 1                 | 1                       |
|                 | 1-2            | 101 | 9.9                  | 1.12 (0.59-2.46)  | 1.46 (0.70-3.03)        |
|                 | >2             | 52  | 11.5                 | 1.43 (0.58-3.51)  | 1.64 (0.65-4.14)        |
| Paracetamol     | 0              | 657 | 8.2                  | 1                 | 1                       |
|                 | 1-2            | 87  | 10.3                 | 1.29 (0.61-2.71)  | 1.53 (0.72-3.29)        |
|                 | >2             | 40  | 12.5                 | 1.60 (0.60-4.24)  | 1.76 (0.65-4.81)        |

\* The numbers differ between the different mild analgesics since not all women provided information about duration of use.

\*\*Testis defined as cryptorchid if it was high scrotal, supra-scrotal, inguinal, and non-palpable.

\*\*\*Adjusted for gestational age, reported disease, twins, and other medicine use during pregnancy.

Supplemental table III: Experimental data from studies on pregnant Wistar dams after intrauterine exposure from GD13-21 (mean  $\pm$  s.e.m.).

| Caesarean section GD21             | No. of<br>Foetuses | No. of<br>Litters | Maternal<br>body weight | Adj. maternal<br>body weight | No.<br>Implantations | No. live<br>foetuses | Resorptions in<br>% of implant. | Males in<br>% of total |
|------------------------------------|--------------------|-------------------|-------------------------|------------------------------|----------------------|----------------------|---------------------------------|------------------------|
| Control                            | 44                 | 4                 | 316.5 $\pm$ 11.5        | 263.1 $\pm$ 10.9             | 11.3 $\pm$ 0.6       | 11.0 $\pm$ 0.4       | 1.9 $\pm$ 1.9                   | 54.4 $\pm$ 4.1         |
| 150 mg/kg/day paracetamol          | 59                 | 5                 | 307.8 $\pm$ 7.9         | 241.4 $\pm$ 6.4              | 12.6 $\pm$ 0.6       | 11.8 $\pm$ 0.7       | 4.7 $\pm$ 3.0                   | 50.8 $\pm$ 5.4         |
| 250 mg/kg/day paracetamol          | 61                 | 5                 | 316.0 $\pm$ 15.8        | 247.0 $\pm$ 12.4             | 12.6 $\pm$ 1.1       | 12.2 $\pm$ 1.0       | 3.1 $\pm$ 1.9                   | 59.2 $\pm$ 6.8         |
| 350 mg/kg/day paracetamol          | 45                 | 4                 | 297.5 $\pm$ 7.9         | 234.4 $\pm$ 6.1              | 12.3 $\pm$ 0.6       | 11.3 $\pm$ 0.8       | 8.1 $\pm$ 4.8                   | 50.0 $\pm$ 9.0         |
| Control                            | 72                 | 6                 | 313.2 $\pm$ 6.9         | 250.7 $\pm$ 5.0              | 13.0 $\pm$ 0.5       | 12.0 $\pm$ 0.7       | 7.9 $\pm$ 3.7                   | 60.5 $\pm$ 5.7         |
| 350 mg/kg/day paracetamol          | 70                 | 6                 | 297.9 $\pm$ 10.5        | 243.4 $\pm$ 5.4              | 10.6 $\pm$ 1.9       | 10.0 $\pm$ 2.0       | 3.5 $\pm$ 1.8                   | 51.5 $\pm$ 6.0         |
| Control                            | 62                 | 6                 | 285.0 $\pm$ 14.5        | 227.2 $\pm$ 9.6              | 11.8 $\pm$ 1.0       | 10.3 $\pm$ 1.6       | 13.6 $\pm$ 8.8                  | 57.3 $\pm$ 8.6         |
| 150 mg/kg/day acetylsalicylic acid | 62                 | 6                 | 291.4 $\pm$ 9.6         | 243.5 $\pm$ 7.7              | 10.0 $\pm$ 2.2       | 8.9 $\pm$ 2.4        | 24.6 $\pm$ 14.6                 | 38.4 $\pm$ 8.6         |
| 200 mg/kg/day acetylsalicylic acid | 56                 | 5                 | 301.2 $\pm$ 8.5         | 244.2 $\pm$ 3.7              | 12.4 $\pm$ 1.6       | 11.2 $\pm$ 2.1       | 13.3 $\pm$ 7.9                  | 62.4 $\pm$ 4.1         |
| 250 mg/kg/day acetylsalicylic acid | 75                 | 7                 | 295.3 $\pm$ 8.4         | 243.0 $\pm$ 5.8              | 11.7 $\pm$ 0.7       | 10.7 $\pm$ 1.1       | 9.3 $\pm$ 5.7                   | 53.0 $\pm$ 7.8         |

Supplemental table IV: Weight and anogenital distance (AGD) for male foetuses after intrauterine exposure of Wistar rats from GD13-21 (mean  $\pm$  s.e.m.).

| Caesarean section at GD21          | N | Weight<br>(g)     | Weight<br>(% of control) | AGD<br>(units)    | AGDi <sup>a</sup><br>(% of control) |
|------------------------------------|---|-------------------|--------------------------|-------------------|-------------------------------------|
| Control                            | 4 | 3.65 $\pm$ 0.11   | 100 $\pm$ 3.0            | 23.12 $\pm$ 0.49  | 100 $\pm$ 1.7                       |
| 150 mg/kg/day paracetamol          | 5 | 3.87 $\pm$ 0.10   | 106.1 $\pm$ 2.6          | 21.08 $\pm$ 0.23* | 89.5 $\pm$ 1.4**                    |
| 250 mg/kg/day paracetamol          | 5 | 3.69 $\pm$ 0.07   | 101.3 $\pm$ 2.0          | 21.15 $\pm$ 0.30* | 91.3 $\pm$ 1.8*                     |
| 350 mg/kg/day paracetamol          | 4 | 3.65 $\pm$ 0.10   | 100.1 $\pm$ 2.6          | 21.44 $\pm$ 0.97  | 92.8 $\pm$ 3.8 <sup>b</sup>         |
| Control                            | 6 | 3.37 $\pm$ 0.18   | 100 $\pm$ 5.2            | 22.37 $\pm$ 0.44  | 100 $\pm$ 0.61                      |
| 350 mg/kg/day paracetamol          | 6 | 3.33 $\pm$ 0.12   | 98.7 $\pm$ 3.6           | 21.4 $\pm$ 0.43*  | 96 $\pm$ 1.09**                     |
| Control                            | 6 | 3.95 $\pm$ 0.35   | 100 $\pm$ 8.8            | 21.01 $\pm$ 0.52  | 100 $\pm$ 2.7                       |
| 150 mg/kg/day acetylsalicylic acid | 5 | 3.57 $\pm$ 0.24   | 90.5 $\pm$ 6.0           | 20.07 $\pm$ 0.40  | 98.4 $\pm$ 2.2                      |
| 200 mg/kg/day acetylsalicylic acid | 5 | 3.48 $\pm$ 0.31   | 88.2 $\pm$ 8.0           | 20.60 $\pm$ 0.80  | 102 $\pm$ 2.1                       |
| 250 mg/kg/day acetylsalicylic acid | 7 | 3.08 $\pm$ 0.16** | 78.1 $\pm$ 3.9           | 19.42 $\pm$ 0.57  | 99.9 $\pm$ 2.2                      |

<sup>a</sup> AGDi is defined as AGD divided by the cube root of the body weight.

\*ANOVA followed by Dunnett's test  $p < 0.05$ .

\*\*ANOVA followed by Dunnett's test  $p < 0.01$ .

<sup>b</sup> ANOVA followed by Dunnett's test  $p = 0.062$ .

Supplemental table V: Testosterone in Wistar rat fetuses at GD21 after intrauterine exposure from GD13-21 (mean  $\pm$  s.e.m.).

| Caesarean section GD21             | N | Testosterone in testes (ng/testis) | Testosterone production in testes (ng/testes) <sup>a</sup> |
|------------------------------------|---|------------------------------------|------------------------------------------------------------|
| Control                            | 4 | 1.31 $\pm$ 0.24                    | 3.76 $\pm$ 1.90                                            |
| 150 mg/kg/day paracetamol          | 5 | 1.63 $\pm$ 0.45                    | 3.88 $\pm$ 1.29                                            |
| 250 mg/kg/day paracetamol          | 5 | 2.06 $\pm$ 0.21                    | 3.58 $\pm$ 1.33                                            |
| 350 mg/kg/day paracetamol          | 3 | 2.11 $\pm$ 0.34                    | 3.35 $\pm$ 1.42                                            |
| Control                            | 6 | 1.29 $\pm$ 0.20                    | 3.15 $\pm$ 0.30                                            |
| 350 mg/kg/day paracetamol          | 6 | 1.56 $\pm$ 0.13                    | 2.43 $\pm$ 0.41                                            |
| Control                            | 6 | 1.24 $\pm$ 0.41                    | 2.12 $\pm$ 0.36                                            |
| 150 mg/kg/day acetylsalicylic acid | 5 | 1.94 $\pm$ 0.28                    | 1.48 $\pm$ 0.24 <sup>b</sup>                               |
| 200 mg/kg/day acetylsalicylic acid | 5 | 0.67 $\pm$ 0.22                    | 1.25 $\pm$ 0.23*                                           |
| 250 mg/kg/day acetylsalicylic acid | 6 | 1.35 $\pm$ 0.27                    | 1.65 $\pm$ 0.20 <sup>c</sup>                               |

<sup>a</sup> Measurements after 3 hours of incubation.

\* ANOVA followed by Dunnett's test  $p < 0.05$  when compared with control

<sup>b</sup> ANOVA followed by Dunnett's test  $p = 0.065$  when compared with control

<sup>c</sup> ANOVA followed by Dunnett's test  $p = 0.077$  when compared with control
